# Supplementary material
Source: PubMed Central journal article supplement (PMC4390490)
Supplement: NIHMS662886-supplement-1.pdf [file NIHMS662886-supplement-1.pdf]

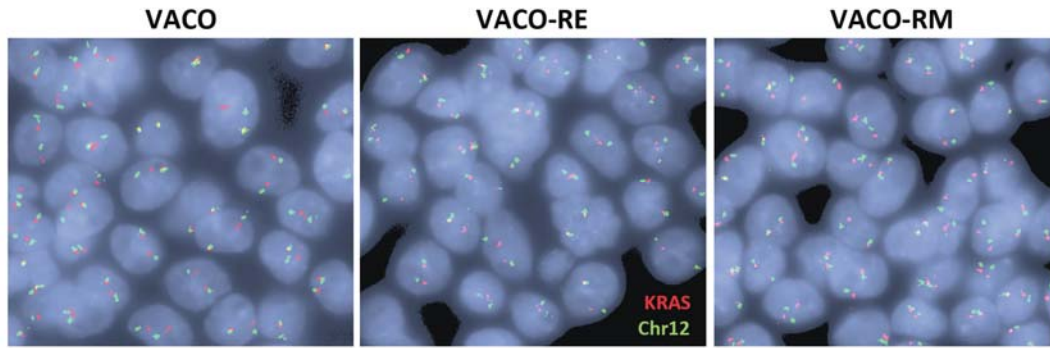

**Fig. S1: *KRAS* FISH analysis of parental and resistant cell lines.** *KRAS* FISH was performed on parental VACO432 cells (VACO) and derivatives made resistant to combined RAF/EGFR inhibition (VACO-RE) or RAF/MEK inhibition (VACO-RM), using probes for *KRAS* (red) and chromosome 12 (Chr12; green).
