# Supplementary material
Source: PubMed Central journal article supplement (PMC4390490)
Supplement: NIHMS662886-supplement-6.pdf [file NIHMS662886-supplement-6.pdf]

| Patient # | Combination                 | Therapy                                                          | Best response by RECIST | Duration of treatment          | Resistance mechanism         |
|-----------|-----------------------------|------------------------------------------------------------------|-------------------------|--------------------------------|------------------------------|
| 1         | RAF/EGFR<br>(prior RAF/MEK) | Encorafenib +<br>cetuximab<br>(prior dabrafenib<br>+ trametinib) | +3%<br><br>(-15%)       | 4.5 months<br><br>(7.3 months) | <i>KRAS</i><br>amplification |
| 2         | RAF/EGFR                    | Dabrafenib +<br>panitumumab                                      | -24%                    | 4.8 months                     | <i>BRAF</i><br>amplification |
| 3         | RAF/MEK                     | Dabrafenib +<br>trametinib                                       | -34%                    | 5.5 months                     | MEK1 F53L<br>(ARAF Q489L*)   |

**Table S1: Patient characteristics and MAPK pathway reactivating resistance mechanisms of *BRAF*-mutant CRC patients with clinical acquired resistance to RAF/EGFR or RAF/MEK inhibitor combinations.** Best response by RECIST indicates maximum reduction in cumulative tumor diameter achieved by RECIST criteria. (\* patient #3 had an ARAF Q489L mutation identified in the post-progression biopsy, but validation studies failed to show a clear role for this mutation in promoting resistance)

**Table S2: Summary of variant calls from WES analysis of matched pre-treatment and post-progression biopsies.** Table provided as excel file.
